# Supplementary material for: Persistence of birth mode-dependent effects on gut microbiome composition, immune system stimulation and antimicrobial resistance during the first year of life
Source: PubMed Central journal article supplement (PMC9723731; doi:10.1038/s43705-021-00003-5), 2021-03-26

Supplementary Figure. 3

**a**

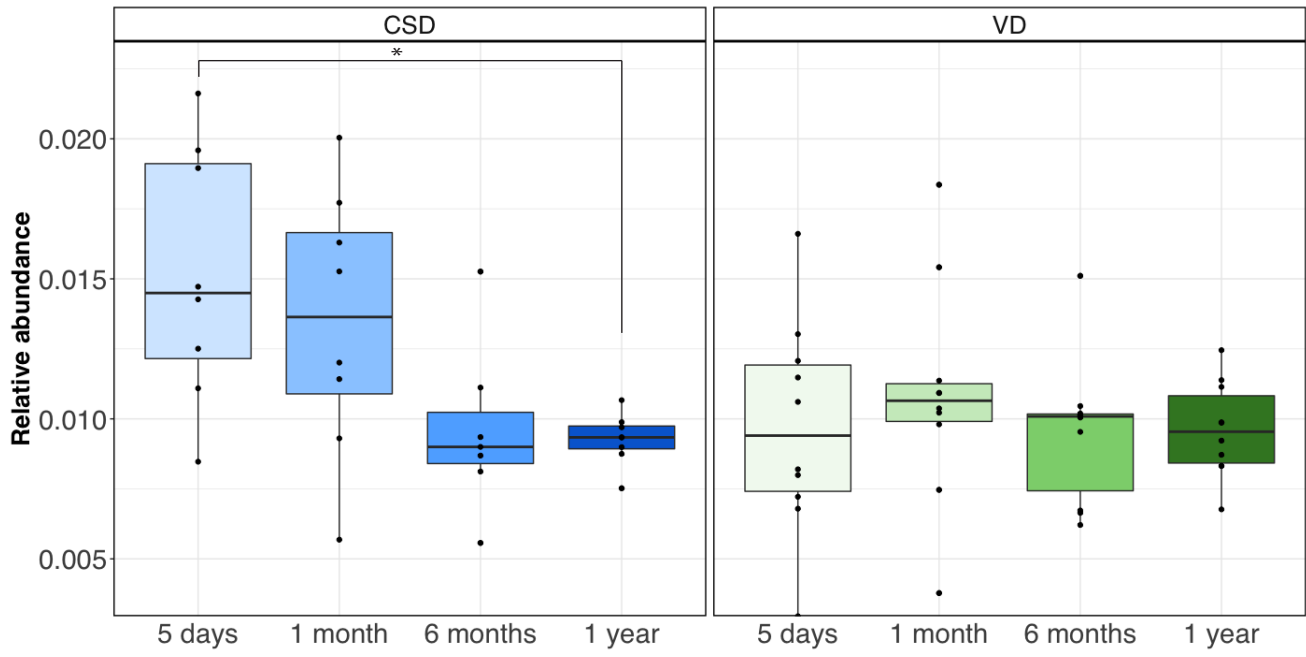

Supplementary Figure 3  
b (i)

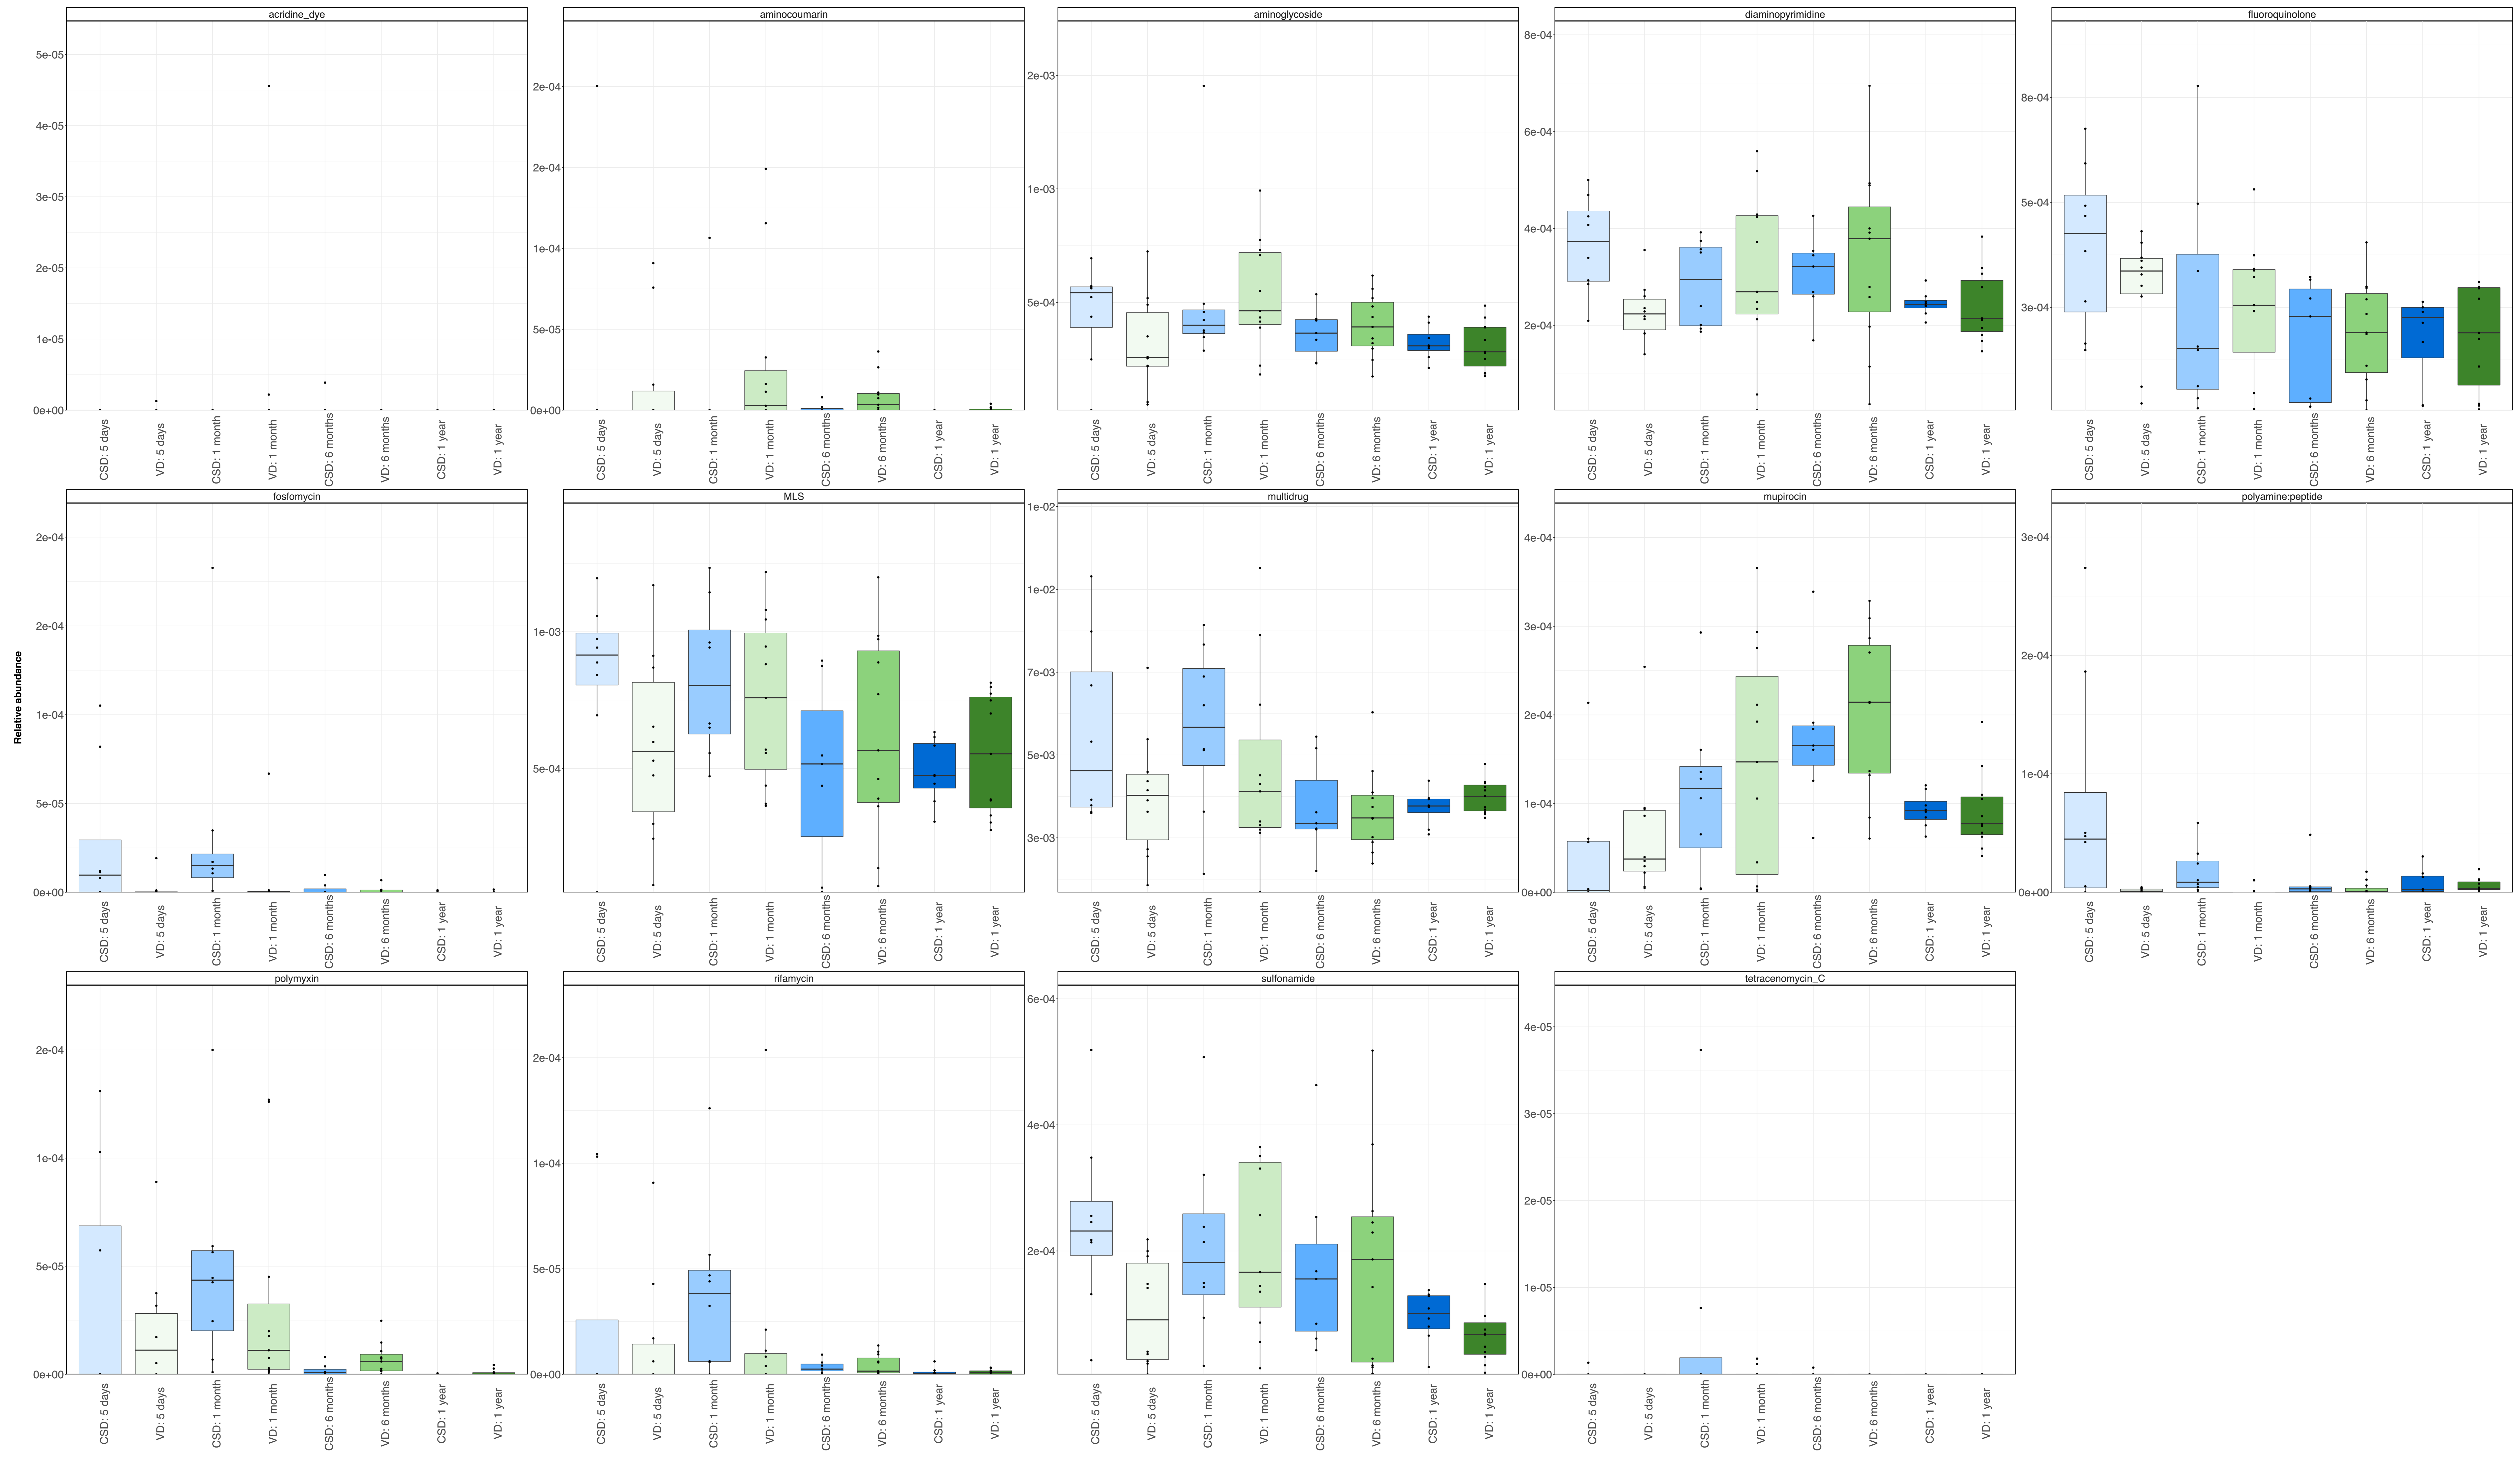

Supplementary Figure 3

b (ii)

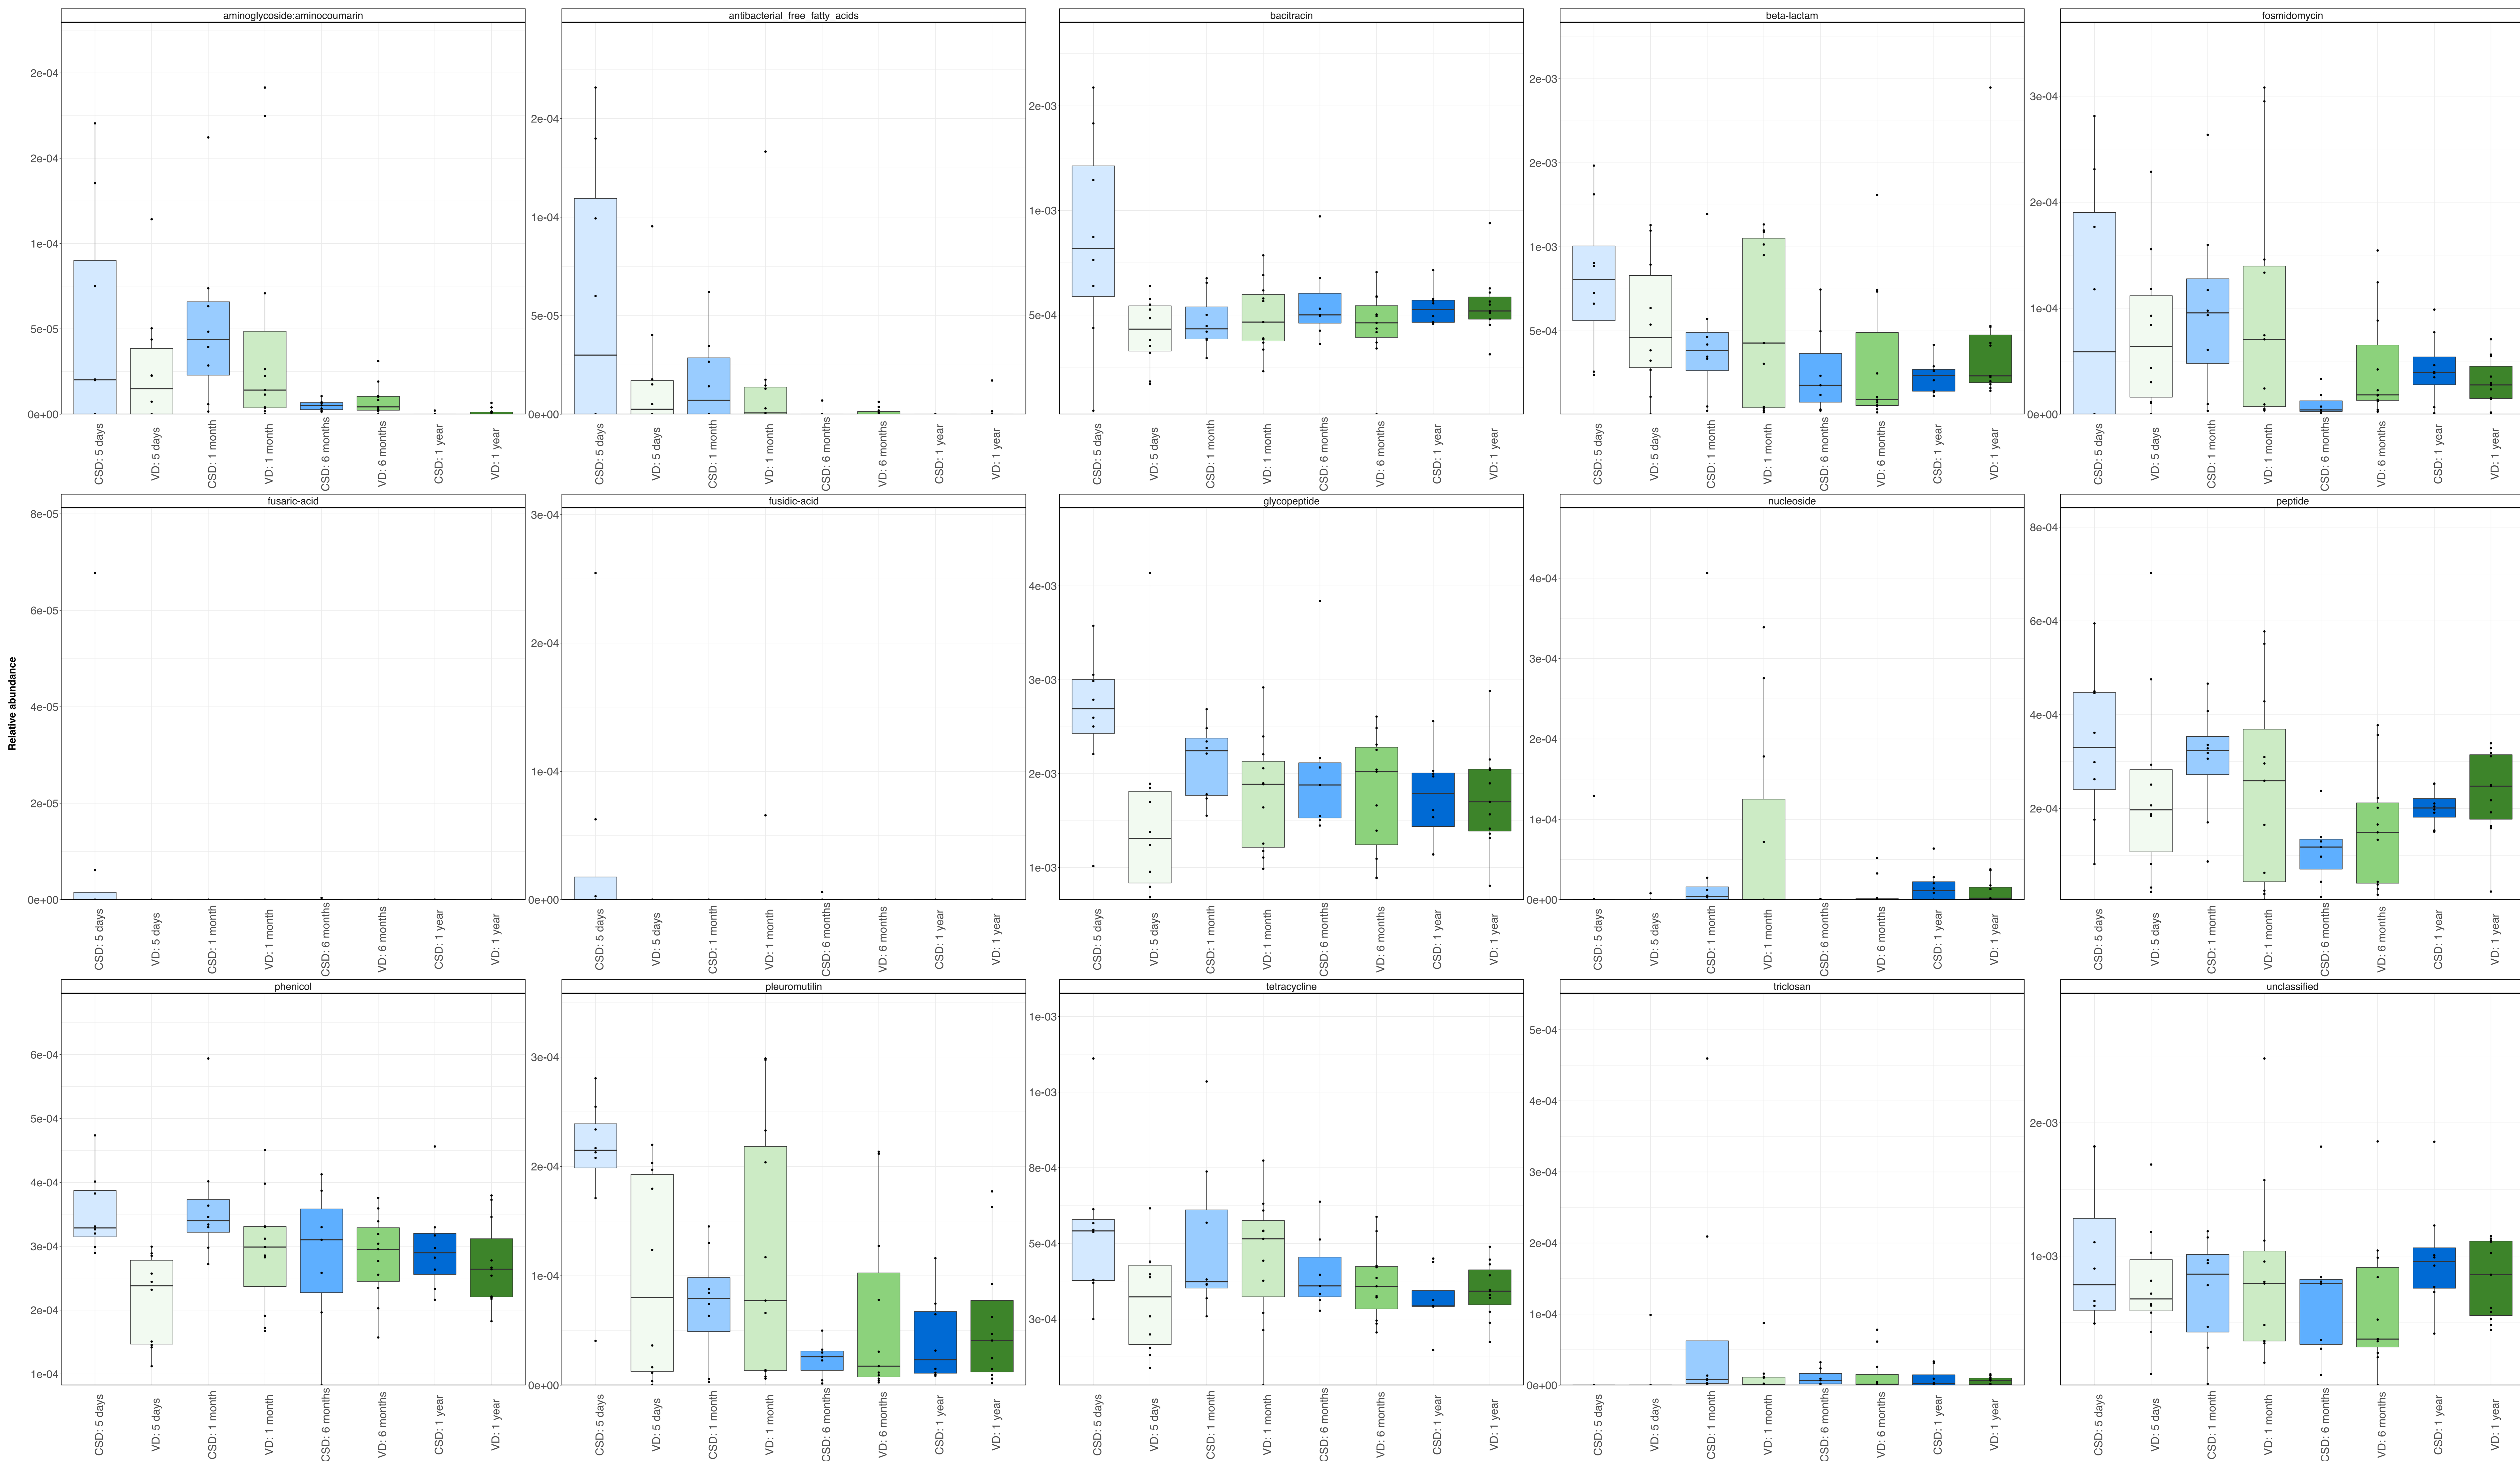

Supplement: 43705_2021_3_MOESM4_ESM.pdf [file 43705_2021_3_MOESM4_ESM.pdf]
