# Supplementary material for: Persistence of birth mode-dependent effects on gut microbiome composition, immune system stimulation and antimicrobial resistance during the first year of life
Source: PubMed Central journal article supplement (PMC9723731; doi:10.1038/s43705-021-00003-5), 2021-03-26

Supplementary Figure. 7

**a**

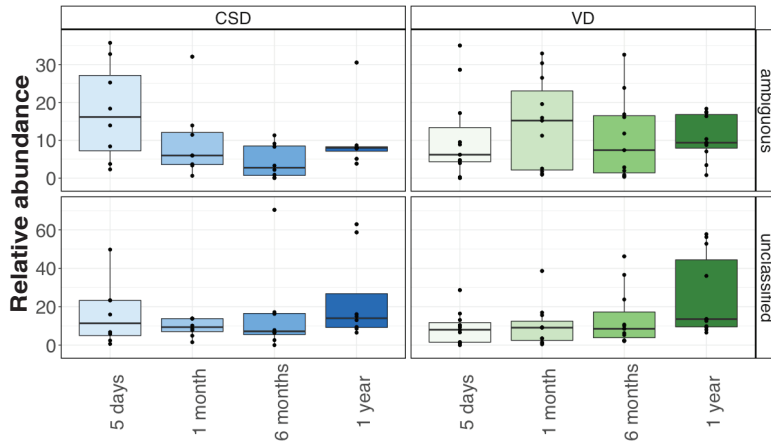

**b**

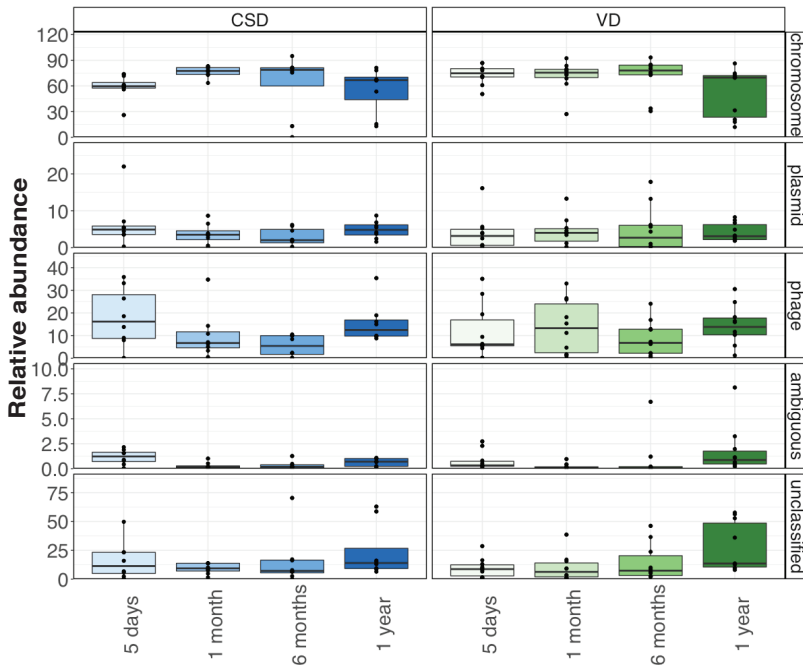

**c**

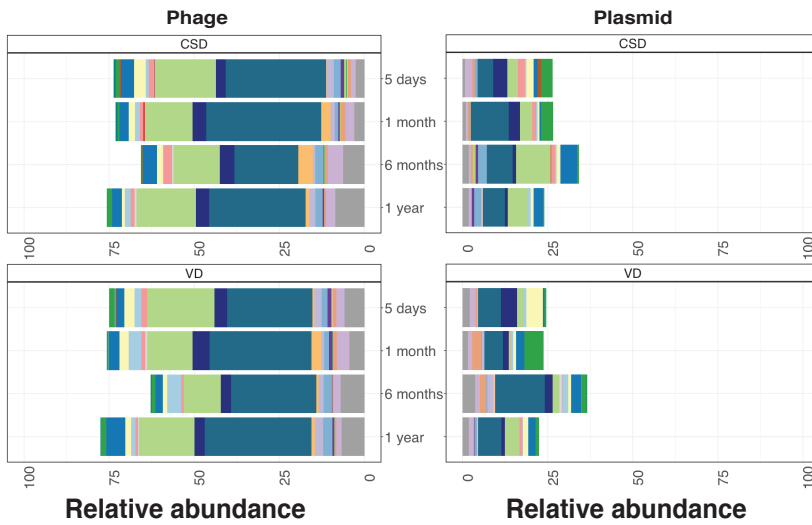

**Category**

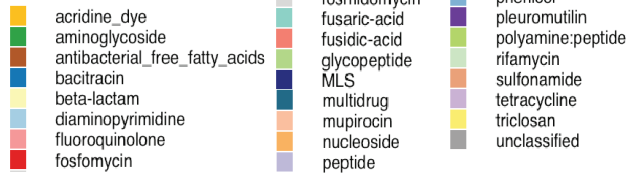

Supplement: 43705_2021_3_MOESM8_ESM.pdf [file 43705_2021_3_MOESM8_ESM.pdf]
