# Supplementary material for: Persistence of birth mode-dependent effects on gut microbiome composition, immune system stimulation and antimicrobial resistance during the first year of life
Source: PubMed Central journal article supplement (PMC9723731; doi:10.1038/s43705-021-00003-5), 2021-03-26
Supplement: 43705_2021_3_MOESM12_ESM.pdf [file 43705_2021_3_MOESM12_ESM.pdf]

**a**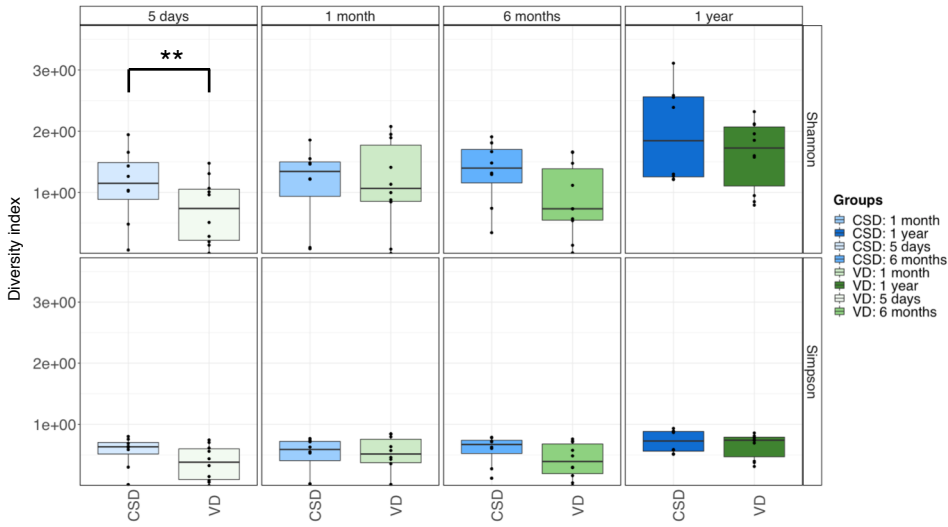**b**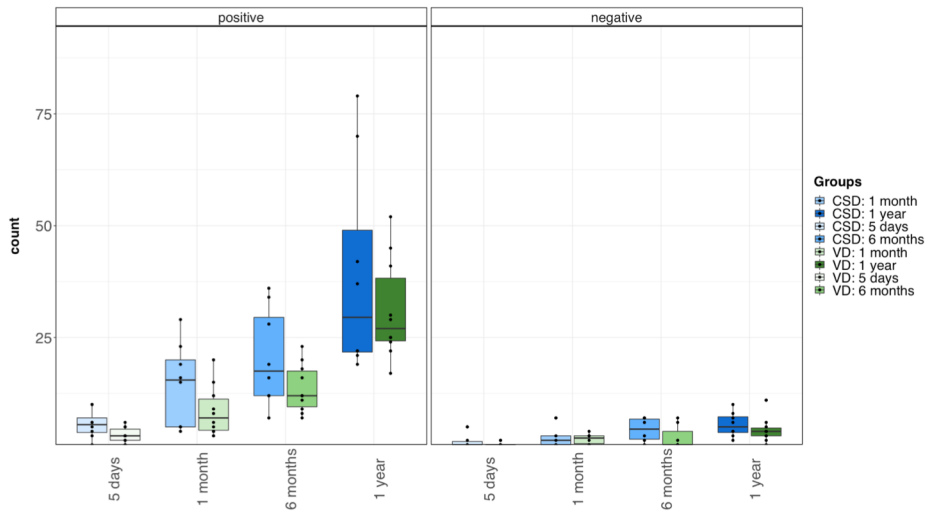**c**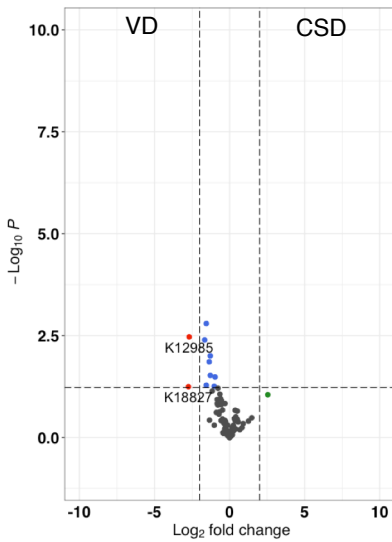**d**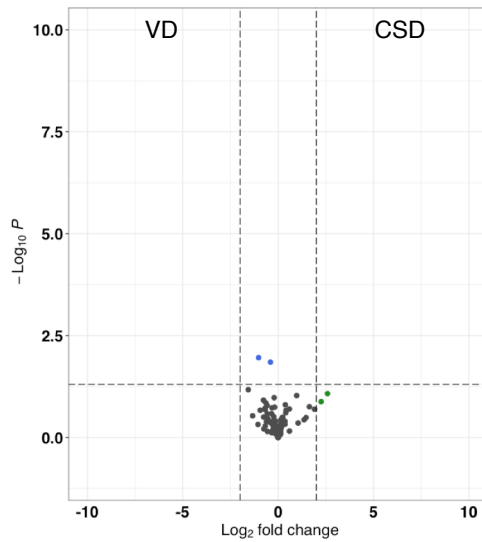**Sig**

- NS
- $\text{Log}_2$  FC
- p-value
- p-value and  $\text{Log}_2$  FC
